# Supplementary material
Source: Springer Nature journal article supplement (https://www.springermedizin.de/resource/supplementary/12885_2012_3818_MOESM1_ESM.pdf/9464298)
Supplement: MOESM1 [file 9464298]

| Symptoms and problems                    | England    | Flanders   | Germany    | Italy      | Netherlands | Portugal   | Spain      |
|------------------------------------------|------------|------------|------------|------------|-------------|------------|------------|
|                                          | sum (rank)  | sum (rank) | sum (rank) |
| <i>Being in pain</i>                     | 2849 (1)   | 2728 (1)   | 2753 (1)   | 2429 (1)   | 2617 (1)    | 2362 (1)   | 2565 (1)   |
| <i>Being a burden to others</i>          | 2312 (2)   | 1697 (3)   | 2170 (2)   | 2298 (2)   | 1751 (3)    | 1958 (2)   | 2552 (2)   |
| <i>Being unable to get your breath</i>   | 1676 (4)   | 1759 (2)   | 2103 (3)   | 1656 (4)   | 2088 (2)    | 1701 (3)   | 1718 (4)   |
| <i>Being alone</i>                       | 1681 (3)   | 1696 (4)   | 1773 (4)   | 1811 (3)   | 1616 (4)    | 1616 (4)   | 1779 (3)   |
| <i>Having no energy</i>                  | 1473 (5)   | 1638 (5)   | 1564 (5)   | 1514 (5)   | 1602 (5)    | 1506 (5)   | 1565 (5)   |
| <i>Being worried and distressed</i>      | 1473 (5)   | 1333 (7)   | 1435 (6)   | 1488 (6)   | 1465 (8)    | 1489 (6)   | 1424 (6)   |
| <i>Changes in the way you look</i>       | 1405 (8)   | 1334 (6)   | 1429 (7)   | 1361 (8)   | 1486 (6)    | 1347 (7)   | 1361 (7)   |
| <i>Feeling as if you want to be sick</i> | 1431 (7)   | 1290 (8)   | 1379 (8)   | 1433 (7)   | 1385 (9)    | 1243 (9)   | 1314 (9)   |
| <i>Having no appetite at all</i>         | 1348 (9)   | 1318 (9)   | 1361 (9)   | 1292 (9)   | 1470 (7)    | 1259 (8)   | 1322 (8)   |

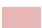

ranked highest

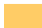

ranked second highest

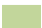

ranked third highest

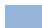

ranked fourth highest
